## The effects of different preventive counseling programs on stress level in patients with paroxysmal atrial fibrillation after catheter ablation

N. Pogossova<sup>1</sup>, Y.M. Yufereva<sup>1</sup>, A.I. Ovchinnikova<sup>2</sup>, O.Y. Sokolova<sup>1</sup>, K.V. Davtyan<sup>3</sup>

<sup>1</sup>National Medical Research Center of Cardiology, Moscow, Russian Federation; <sup>2</sup>Federal State Budgetary Institution "9 Diagnostic and Treatment Center" of the Ministry of Defense, Moscow, Russian Federation; <sup>3</sup>National Center for Preventive Medicine, Moscow, Russian Federation

**Funding Acknowledgement:** Type of funding source: None

**Background:** Stressful life events may trigger paroxysmal atrial fibrillation (AF) and chronic stress is known to negatively affect long-term outcomes in cardiovascular diseases.

**Purpose:** To assess the impact of different preventive counseling programs on stress level in patients (pts) after catheter ablation (CA) performed for paroxysmal AF.

**Methods:** This is a prospective randomized controlled study with 3 parallel groups of pts with paroxysmal AF after CA (radiofrequency or cryoablation). Pts were randomized into 3 groups in 1:1:1 ratio. During hospitalization for CA pts from all groups received single-session preventive counseling with focus on their individual cardiovascular risk factors profile. After discharge pts from Group 1 received remote preventive counseling by phone and pts

from Group 2 by email every two weeks for the first 3 months after enrollment (a total of 6 sessions). Group 3 received usual care. All pts underwent stress assessment using a 10-point visual analogue scale (VAS) at baseline and at 12 months after CA.

**Results:** A total of 135 pts aged 35 to 80 years were enrolled (mean age 57.3±9.1 years, 51.8% men). The groups were well balanced according to demographic and clinical features. At 1 year of follow-up there was a significant reduction of average stress level in both intervention groups vs. control (Table).

**Conclusions:** Preventive counseling followed by 3 months of remote support via phone and email reduced the stress level in AF pts after CA.

The stress levels over 12 months

|                                   | Group 1<br>(support via phone) | Group 2<br>(support via email) | Control group       | Differences,<br>Group 1 vs. Control | Differences,<br>Group 2 vs. Control |
|-----------------------------------|--------------------------------|--------------------------------|---------------------|-------------------------------------|-------------------------------------|
| Baseline (points)                 |                                |                                |                     | n/s                                 | n/s                                 |
| Mean ± SD                         | 5.3±2.3                        | 5.1±2.8                        | 5.6±2.5             |                                     |                                     |
| Me (25%; 75%)                     | 5 (4; 7)                       | 5 (2.5; 7)                     | 6 (4; 8)            |                                     |                                     |
| At 12 months (points)             |                                |                                |                     | 0.003                               | <0.001                              |
| Mean ± SD                         | 4.5±2.3*                       | 3.2±1.7**                      | 5.6±1.6             |                                     |                                     |
| Me (25%; 75%)                     | 5 (3; 5)                       | 3 (2; 4)                       | 6 (5; 6)            |                                     |                                     |
| Δ% after 12 months, Me (25%; 75%) | -16.7 (-57.1; 25.0)            | -50.0 (-60.0; -5.0)            | -10.0 (-25.0; 50.0) | n/s                                 | <0.001                              |

SD = standard deviation. \*p<0.05 compared with baseline; \*\*p<0.001 compared with baseline.
